# Supplementary material for: Histone H3 Methylation and Autosomal vs. Sex Chromosome Segregation During Male Meiosis in Heteroptera
Source: Frontiers journal article supplement (doi:10.3389/fevo.2022.836786), 2022-03-07
Supplement: Table_1.DOCX [file Table_1.DOCX]

**SUPPLEMENTARY MATERIAL**

**Table 1.** List of species, sampling location geographical coordinates, and number specimens used in the present study.

| Species | Sampling location | Geographical coordinates | Nº male adult-nymph / Nº female | | |
| --- | --- | --- | --- | --- | --- |
| *Belostoma elegans* | Almagro (Ciudad Autónoma de Buenos Aires). XII, 2007 | 34°36′00″S 58°25′00″W | 2-0 / 0 | | | |
| Juan Bautista Segura Municipal golf field (Ciudad Autónoma de Buenos Aires). I, 2008 | 34°33'30"S 58°26'11"W | 13-0 / 0 | | | |
| El Palmar National Park (Entre Ríos province). IV, 2009 | 31°51′11″S 58°19′21″W | 3-0 / 0 | | | |
| Corrientes (Corrientes province). XII, 2009 | 27°29′00″S 58°49′00″W | 3-0 / 0 | | | |
| Zárate (Buenos Aires province). I, 2010 | 34°05′00″S 59°02′00″W | 6-0 / 0 | | | |
| Belgrano (Ciudad Autónoma de Buenos Aires). III, 2010 | 34°33′45″S 58°27′30″W | 1-0 / 0 | | | |
| *B. oxyurum* | Otamendi (Buenos Aires province). II, 2009 | 34°14′03″S 58°53′10″W | 14-0 / 0 | | | |
| Ribera Norte Municipal Natural Park (Buenos Aires province). III, 2009 | 34°28′12″S 58°29′46″W | 2-0 / 0 | | | |
| *Holhymenia rubiginosa* | Faculty of Agronomy (Ciudad Autónoma de Buenos Aires). II, 2009 | 34°35′37″S 58°29′03″W | 2-1 / 0 | | | | |
| Belgrano (Ciudad Autónoma de Buenos Aires). II, 2009 | 34°33′45″S 58°27′30″W | 5-2 / 0 | | | | |
| Saavedra Park (Ciudad Autónoma de Buenos Aires). XII, 2009 | 34°33′2.5″S 58°28′47.1″W | 2-0 / 0 | | | | |
| Belgrano (Ciudad Autónoma de Buenos Aires). III, 2010 | 34°33′45″S 58°27′30″W | 5-0 / 0 | | | | |
| Belgrano (Ciudad Autónoma de Buenos Aires). January, 2011 | 34°33′45″S 58°27′30″W | 3-0 / 0 | | | | |
| Saavedra Park (Ciudad Autónoma de Buenos Aires). I, 2011 | 34°33′2.5″S 58°28′47.1″W | 1-0 / 0 | | | | |
| Belgrano (Ciudad Autónoma de Buenos Aires). II, 2011 | 34°33′45″S 58°27′30″W | 3-1 / 0 | | | | |
| *Phthia picta* | Pueblo Liebig (Entre Ríos province). I, 2008 | 32°09′12″S 58°11′28″W | 4-4 / 0 | | | | |
| Ciudad Universitaria (Ciudad Autónoma de Buenos Aires). II, 2008 | 34°32′31″S 58°26′33″W | 3-4 / 0 | | | | |
| El Palmar National Park (Entre Ríos province). XI, 2008 | 31°51′11″S 58°19′21″W | 3-0 / 0 | | | | |
| El Palmar National Park (Entre Ríos province). IV, 2009 | 31°51′11″S 58°19′21″W | 4-0 / 3 | | | | |
| Ciudad Universitaria (Ciudad Autónoma de Buenos Aires). III, 2011 | 34°32′31″S 58°26′33″W | 5-1 / 2 | | | | |
| *Pachylis argentinus* | La Plata (Buenos Aires province). XI, 2010 | 34°53′39″S 57°57′53″W | 20-2 / 0 | | | | |
| La Plata (Buenos Aires province). XI, 2010 | 34°53′39″S 57°57′53″W | 26-3 / 0 | | | | |
| *Oncopeltus unifasciatellus* | Delta del Paraná Biosphere reserve (Buenos Aires province). I, 2003 | 34°10′00″S 58°31′00″W | 4-0 / 0 |
| Ciudad Universitaria (Ciudad Autónoma de Buenos Aires). IV, 2010 | 34°32′31″S 58°26′33″O | 4-3 / 4 | |
